# Supplementary material for: A Novel ZIP4-HDAC4-VEGFA Axis in High-Grade Serous Ovarian Cancer
Source: MDPI journal article supplement (doi:10.3390/cancers13153821), 2021-07-29
Supplement: s1 [file s1]

## Supplementary Materials

*ZIP4 sensitized HGSOC cells to ClassIIa HDACis.*

In addition to TSA, a pan HDACi, we tested six FDA-approved HDACis: valproic acid (mainly targeting HDAC1), belinostat (a relatively weak pan HDACi); mocetinostat (targeting HDAC1-3), panobinostat (PANO, a pan HDACi), pracinostat (targeting HDAC1-11), and entinostat (targeting HDAC1,3). ZIP4 sensitized cells to other pan HDACis, such as PANO and pracinostat, but not those Class I selective HDACis, such as valproic acid, mocetinostat, and entinostat (**Fig. S1**). These results suggest that this ZIP4 effect is not Class I HDAC dependent.

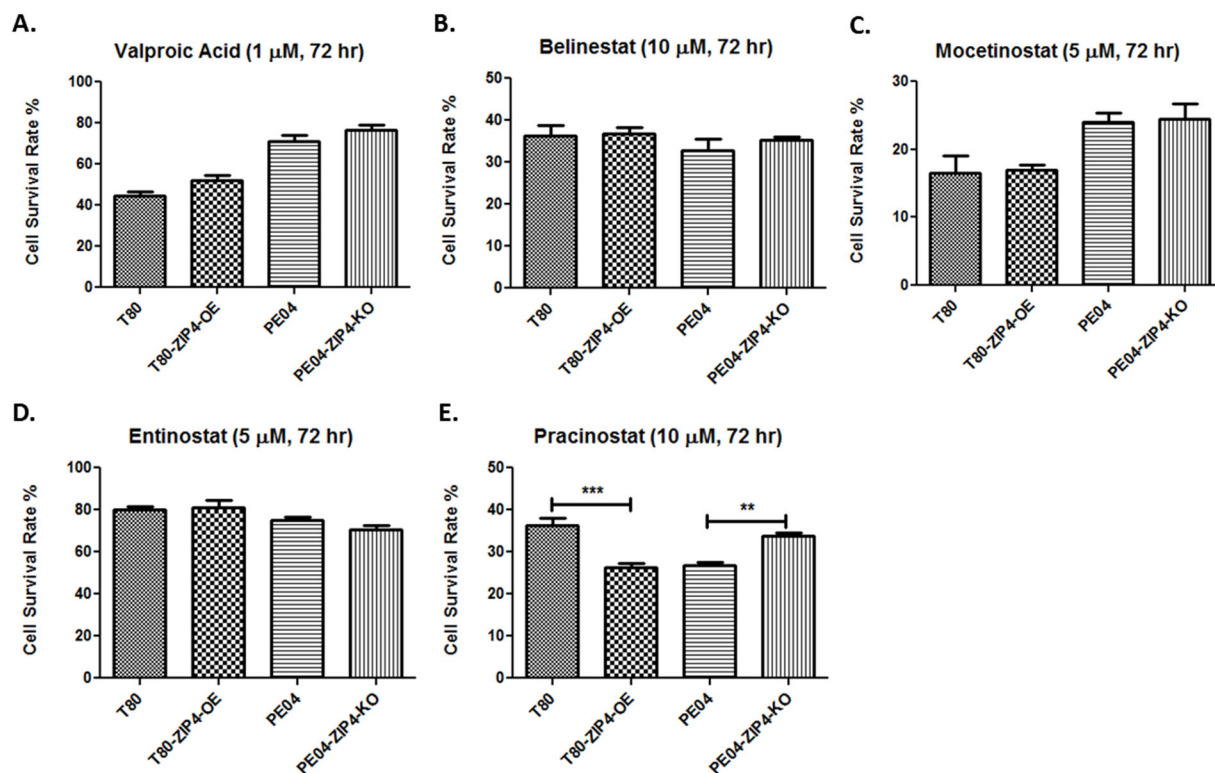

**Figure S1.** ZIP4 only sensitized Class IIa targeting HDACi in HGSOC cells. ZIP4-OE in T80 cells, ZIP4 or NOTCH3-KO in PE04 cells did not significantly change cell proliferation/survival responses to different valproic acid (A), belinostat (B), mocetinostat (C), and entinostat (D). In contrast, ZIP4-OE in T80 cells sensitized to pracinostat and ZIP4- and NOTCH3-KO in PE04 cells resulted in more resistance to pracinostat-induced cell death (E).

*The effects of ZIP4 and HDAC4 on HIF expression*

Under normoxic conditions, we found that ZIP4/KD and HDAC4-KD in PEA2 cells reduced the levels of HIF1 $\alpha$  (Figure S2). This may be related to HDAC4's effect on HIF1 $\alpha$  acetylation and stabilization as previously reported HIF1 $\alpha$  [47, 48].

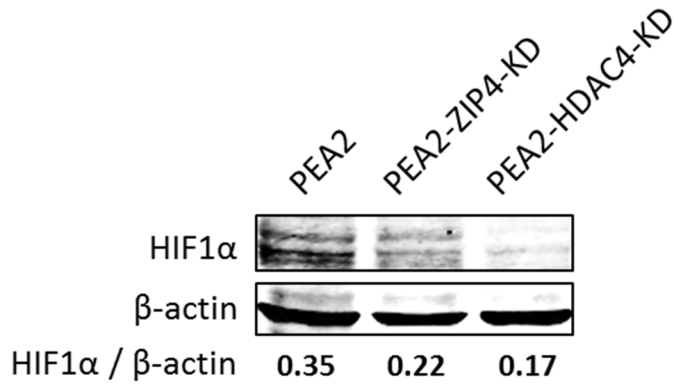

**Figure S2.** The effects of ZIP4 and HDAC4 on HIF1 $\alpha$  expression in PEA2 cells. The antibody used was a purified Mouse Anti-Human HIF1 $\alpha$  antibody (Cat Log#: 610958, BD Biosciences, San Jose, CA, USA).
